# Supplementary material for: Discrimination of emotional states from scalp- and intracranial EEG using multiscale Rényi entropy
Source: PLOS journal article supplement (doi:10.1371/journal.pone.0186916), 2017-11-03
Supplement: S8 (10.1371/journal.pone.0186916.s008) [file journal.pone.0186916.s008]

## S8\_Appendix: Phase synchrony between simulated and mid-frontal EEG

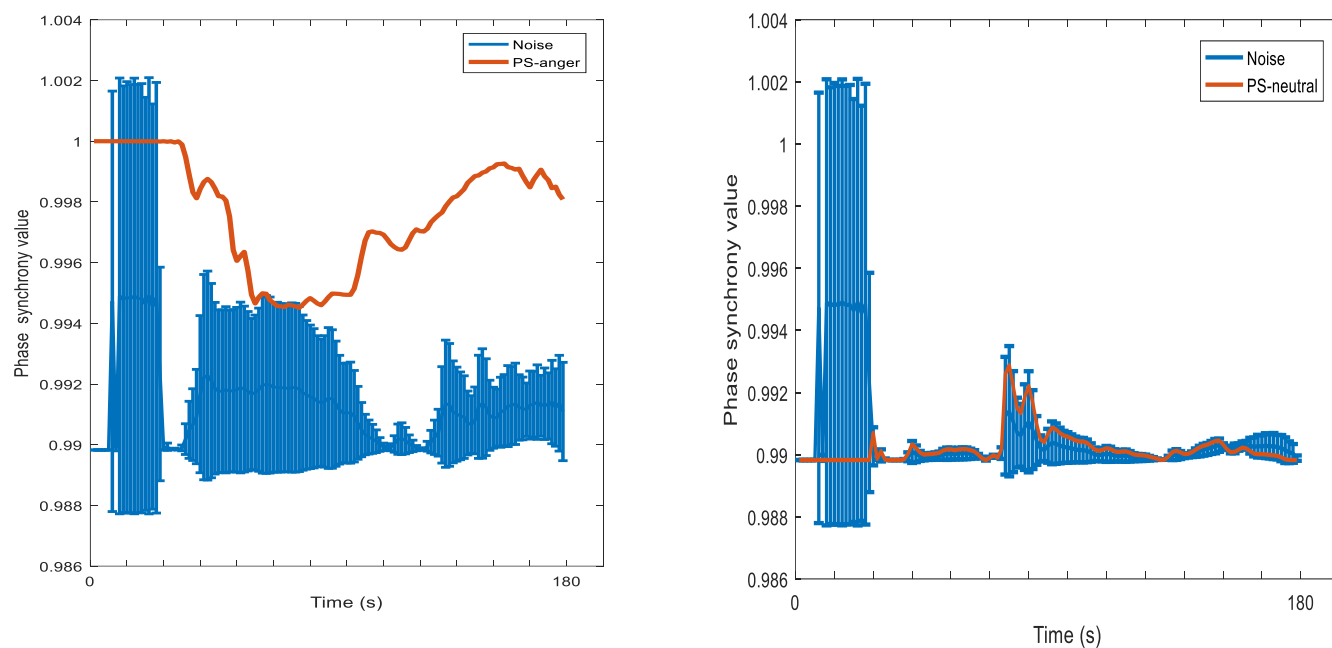

**S8 Fig. : Phase synchrony between simulated- (for mixed amygdala dipole orientation case) and recorded mid-frontal EEG. Shown are the results for the emotional ('anger') (red curve, left panel) and neutral video clips (red curve, right panel) and for the corresponding surrogate signal distributions (blue)**
